# Supplementary material for: KDM6A promotes imatinib resistance through YY1-mediated transcriptional upregulation of TRKA independently of its demethylase activity in chronic myelogenous leukemia
Source: PubMed Central journal article supplement (PMC7806474; doi:10.7150/thno.50571), 2021-01-01
Supplement: thnov11p2691s1.pdf [file thnov11p2691s1.pdf]

## Supplementary Materials

### **KDM6A promotes imatinib resistance through YY1-mediated transcriptional upregulation of TRKA independently of its demethylase activity in chronic myelogenous leukemia**

Chengwan Zhang<sup>1</sup>, Li Shen<sup>2</sup>, Yifu Zhu<sup>4</sup>, Ran Xu<sup>3</sup>, Zhikui Deng<sup>2</sup>, Xiaoning Liu<sup>2</sup>, Yihan Ding<sup>2</sup>, Chunling Wang<sup>2</sup>, Yuye Shi<sup>2</sup>, Liye Bei<sup>2</sup>, Dongping Wei<sup>5</sup>, Rick F. Thorne<sup>6,7</sup>, Xu Dong Zhang<sup>6,8</sup>, Liang Yu<sup>1,2\*</sup>, Song Chen<sup>3,6\*</sup>

<sup>1</sup>Department of Central Laboratory, The Affiliated Huaian No. 1 People's Hospital, Nanjing Medical University, Huai'an, Jiangsu, 223300, China

<sup>2</sup>Department of Hematology, The Affiliated Huaian No.1 People's Hospital, Nanjing Medical University, Huai'an, Jiangsu, 223300, China

<sup>3</sup>Institute of Medicinal Biotechnology, Jiangsu College of Nursing, Huai'an, Jiangsu, 223300, China

<sup>4</sup>The Chinese Academy of Sciences (CAS), Key Laboratory of Innate Immunity & Chronic Disease, CAS Center for Excellence in Cell & Molecular Biology, School of Life Sciences, University of Science & Technology of China, Hefei 230026, China

<sup>5</sup>Department of Oncology, Nanjing First Hospital, Nanjing Medical University, Nanjing, 210006, China

<sup>6</sup>Translational Research Institute of Henan Provincial People's Hospital and People's Hospital of Zhengzhou University, and Molecular Pathology Center, Academy of Medical Sciences, Zhengzhou University, Zhengzhou, Henan 450053, China

<sup>7</sup>School of Environmental and Life Sciences, The University of Newcastle, NSW, 2258, Australia

<sup>8</sup>School of Biomedical Sciences and Pharmacy, The University of Newcastle, NSW, 2308, Australia

\* To whom correspondence may be addressed. Email: hayyyl@njmu.edu.cn (L.Y) or schen@zzu.edu.cn (S.C)

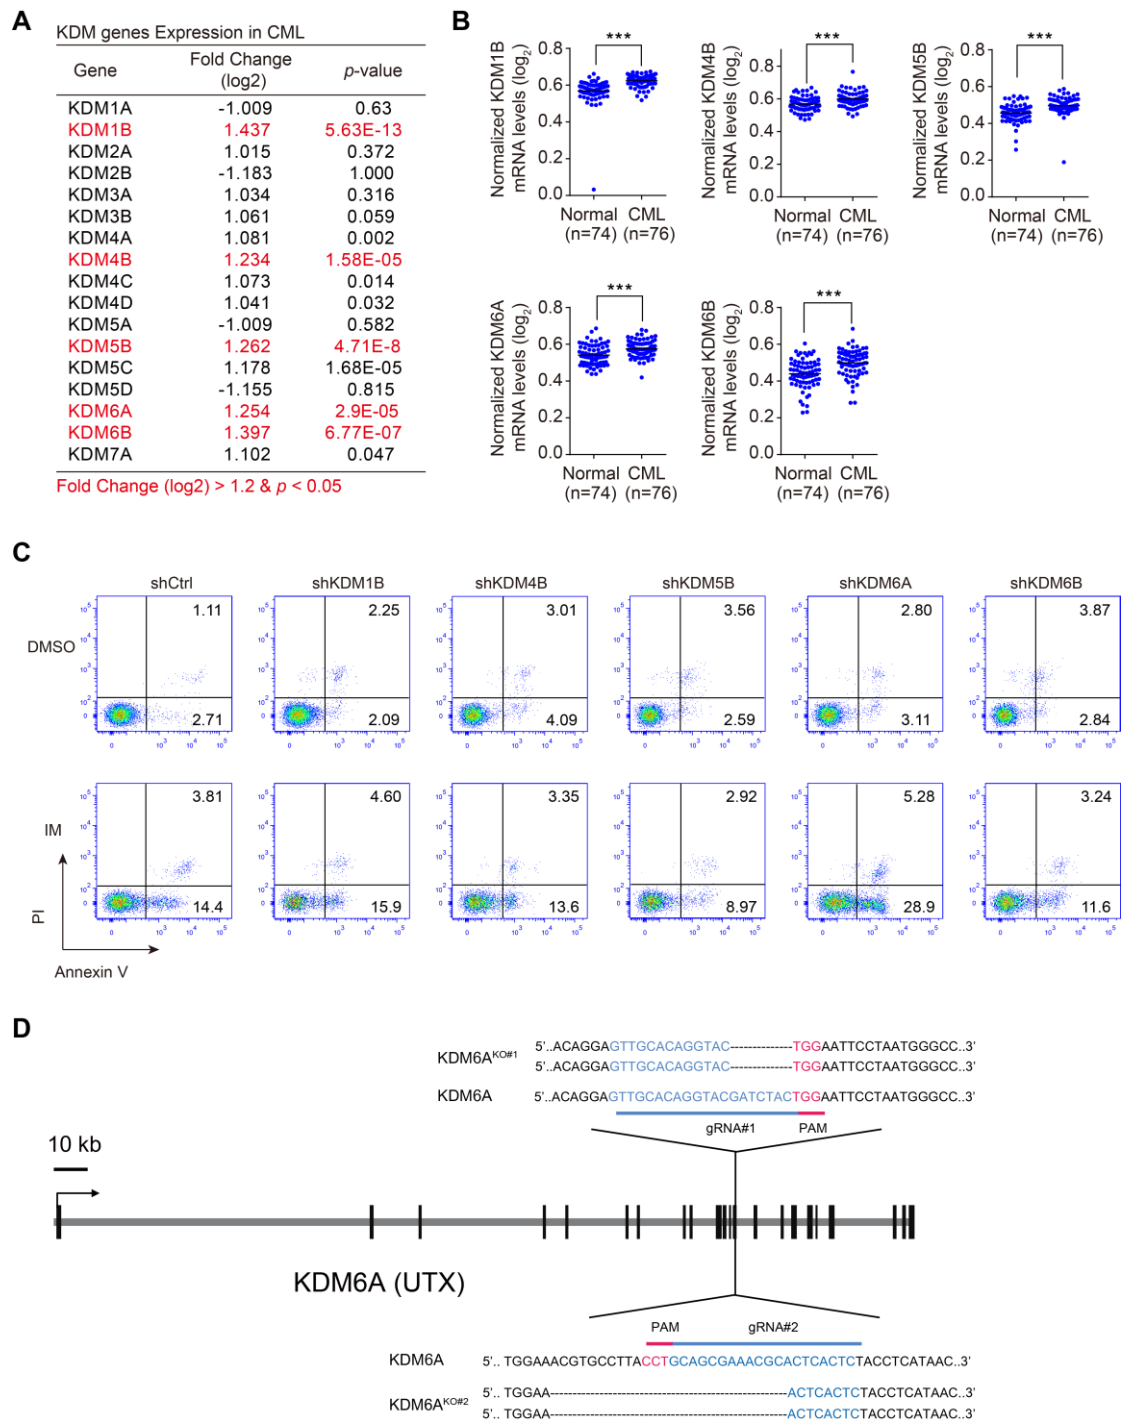

**Figure S1. Differential expression of KDMs in CML and CRISPR-mediated knockout of KDM6A.**

(A, B) Relative mRNA expression changes amongst KDM family members between non-leukemia and healthy bone marrow (n=74) and CML (n=76) derived from the oncomine Haferlach Leukemia dataset (GEO accession no.13159) (A). Five KDMs with log<sub>2</sub>fold change > 1.2 and p values < 0.05 are highlighted in red and data derived from GEO2R online

analysis of the relative expression levels of KDMs in gene expression dataset, GSE13159 were plotted in **(B)** using GraphPad Prism 6. Horizontal bar shows mean. Unpaired, two-tailed Student's t-test; Mann-Whitney test (KDM1B, KDM5B); \*\*\* $p < 0.001$ .

**(C)** Representative FACS dotplots of FITC Annexin V/PI staining used to assess apoptosis after shRNA-mediated knockdown of different KDMs in the K562 cell line. Treatment responses comparing cells treated with vehicle (DMSO) or 0.5  $\mu\text{M}$  IM for 24 h.

**(D)** Schematic illustration of the KDM6A gene structure and genomic sequences of two K562 KDM6A knockout clones generated *via* the CRISPR/Cas9 system. PAM sequences and gRNA targeted sequences are highlighted in pink and blue, respectively, with deleted sequences designated by dashes.

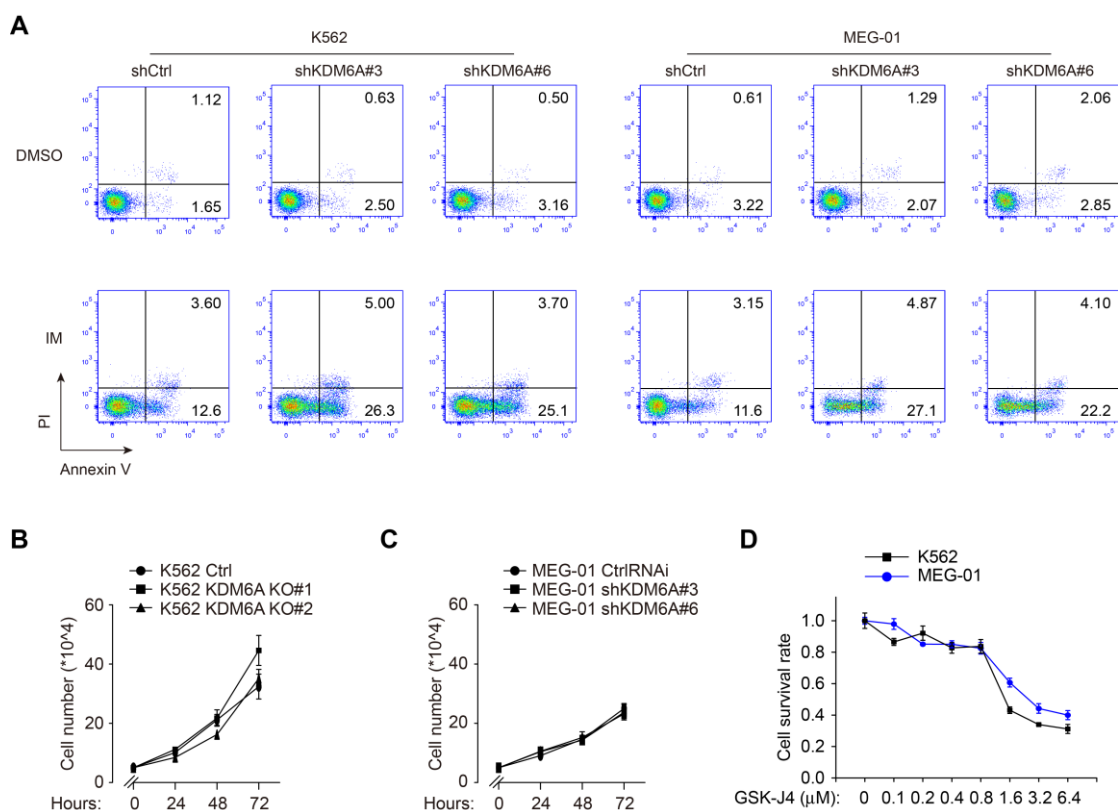

**Figure S2. Role of KDM6A in imatinib-induced apoptosis in K562 and MEG-01 cell lines.**

(A) Representative FACS dotplots of FITC Annexin V/PI staining used to assess apoptosis after knockdown of KDM6A using two independent shRNAs targeting KDM6A in the K562 and MEG-01 cell lines. Treatment responses comparing cells treated with vehicle (DMSO) or 0.5 μM IM for 24 h.

(B,C) KDM6A depletion has no effect on K562 (B) and MEG-01 (C) cell proliferation. (B) The KDM6A KO#1 and KO#2 K562 cells and their control cells were seeded. (C) and then the cell number was counted by trypan blue exclusion method at the times indicated. The results are shown as mean ± s.d. of triplicated cultures.

(D) GSK-J4 dose-response effects on cell viability were determined in CML cell lines after 24 h treatment using CCK-8 assay. Mean ± s.d. are given for three independent experiments.

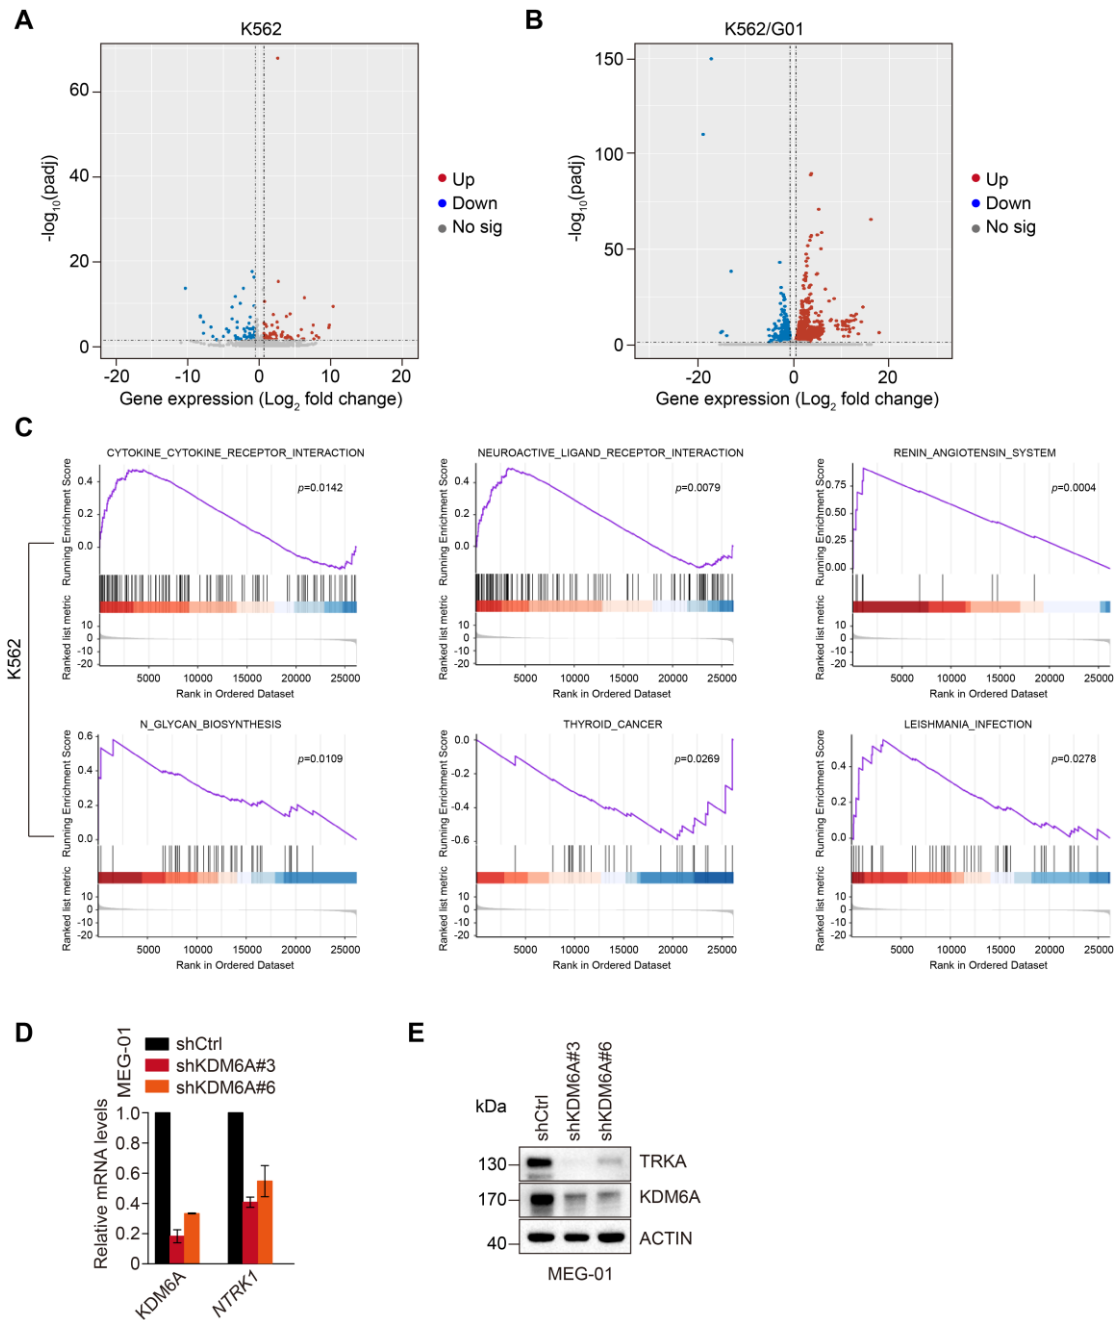

**Figure S3. Differentially expressed genes following loss of KDM6A.**

(A,B) Genes differentially expressed between control and KDM6A-depleted K562 or K562/G01 cells using RNAseq. Volcano plot shows the  $\log_2$  fold change (x-axis) and significance ( $-\log_{10}$  adjusted p-value; y-axis) with significantly downregulated and upregulated genes shown in blue and red, respectively. Significance cutoffs for differential expression were adjusted  $p < 0.05$  and  $|\log_2\text{foldchange}| > 0.6$ .

(C) KEGG pathway analysis of K562 RNA-seq data using GSEA.

(D, E) Analysis of TRKA expression after depletion of KDM6A in MEG-01 cells using qPCR (D) and Western blot (E). Mean  $\pm$  s.d. are given for three independent experiments.

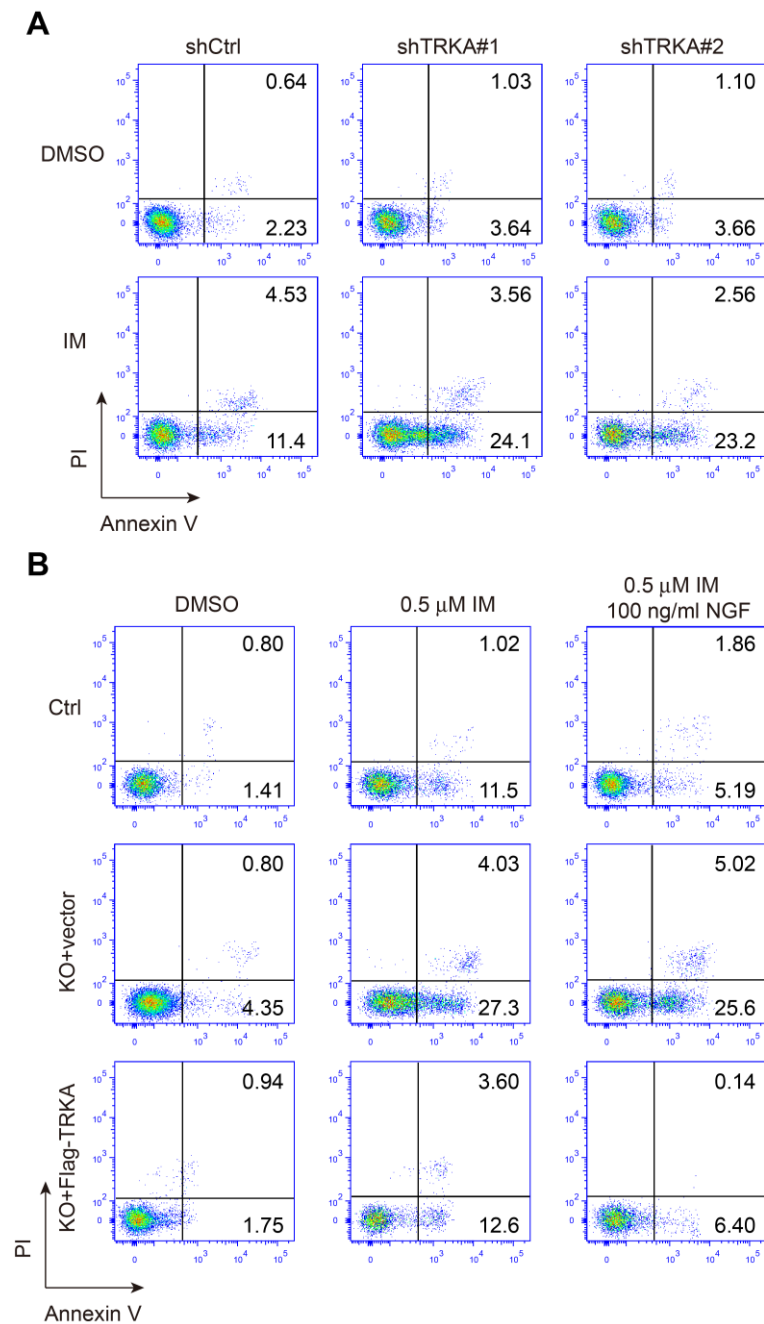

**Figure S4. Role of TRKA and NGF signaling in CML cell line resistance to imatinib**

(A) Representative FACS dotplots of FITC Annexin V/PI staining used to assess apoptosis after shRNA-mediated knockdown using two independent shRNAs targeting TRKA in the K562 cells treated with vehicle (DMSO) or 0.5  $\mu$ M IM for 24 h.

(B) Representative FACS dotplots of FITC Annexin V/PI staining used to assess apoptosis after addition of carrier (DMSO) or 0.5  $\mu$ M imatinib for 24 h alone or in combination with 100 ng/mL NGF. Parental control K562 cells are compared with KDM6A KO cells transfected with control (vector) or Flag-TRKA.

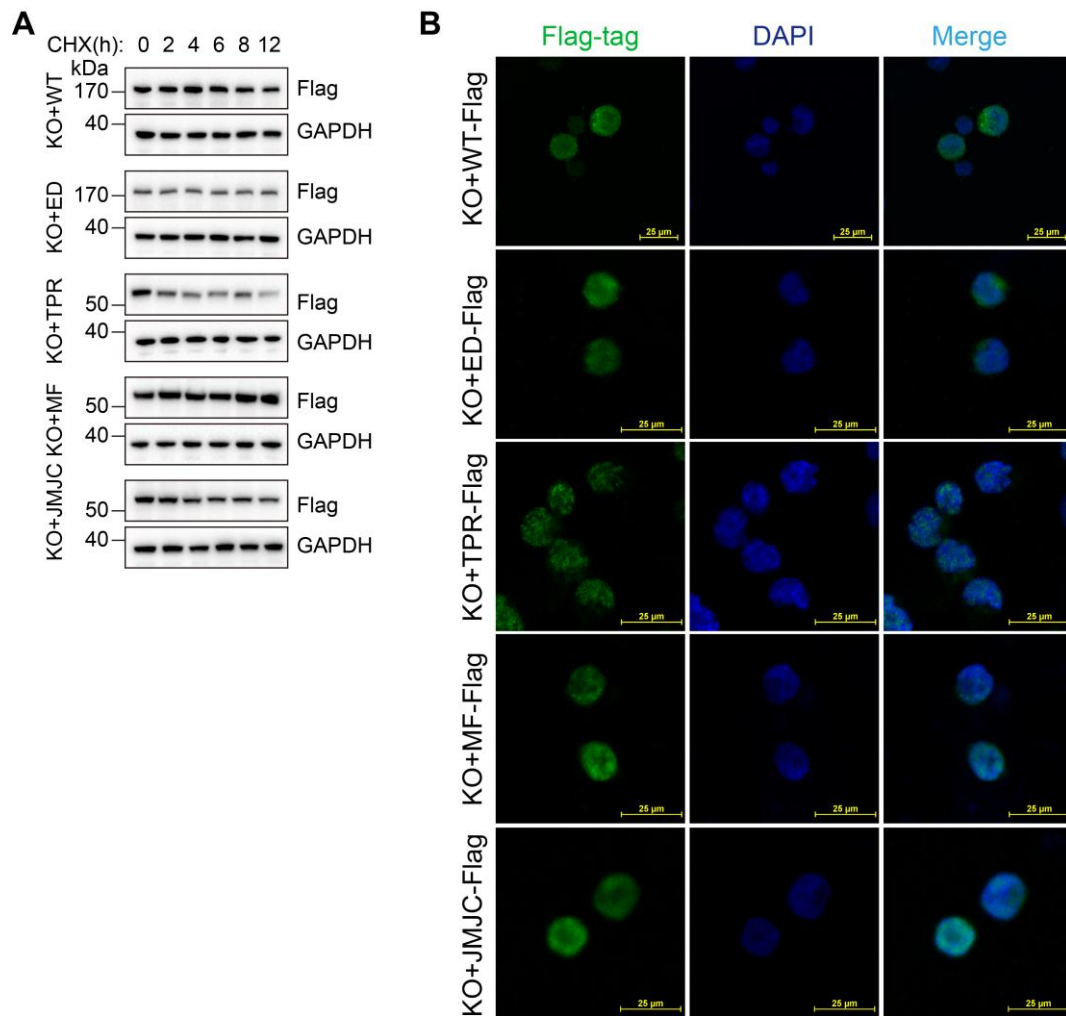

**Figure S5. The stability and localization of KMD6A mutants**

(A) Half-life of wildtype KDM6A and truncation mutants in K562 cells was assessed by cycloheximide (CHX) treatment for indicated times.

(B) The localization of KDM6A protein and truncations in K562 cells by immunofluorescence microscopy.

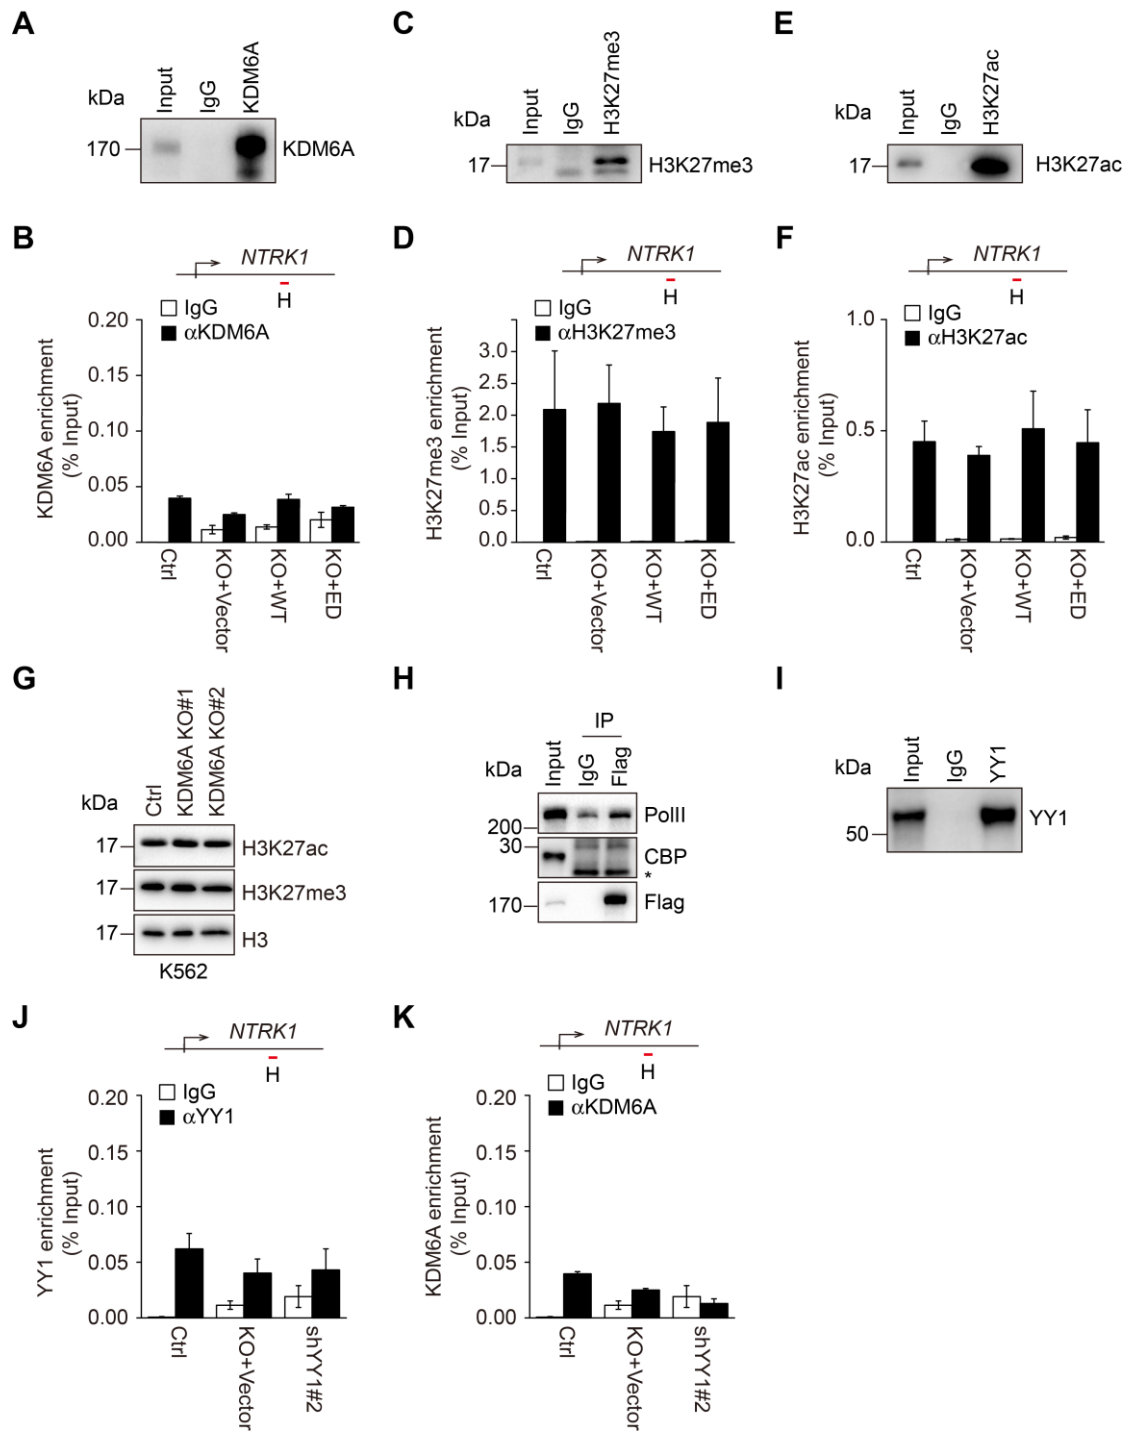

**Figure S6.** KDM6A is recruited to the NTRK1 promoter by YY1

(A-F) K562 cells were subjected to CHIP assay using antibodies against KDM6A (A), H3K27me3 (C) and H3K27ac (E). Western blot showing the efficient enrichment of targets as indicated (A,C,E). IgG was used as a control.

ChIP-qPCR assays were conducted as per (Fig4.I) against KDM6A (B), H3K27me3 (D), H3K27ac (F) against amplicon targeting H, comparing parental K562 cells (Ctrl) against



KDM6A KO#2 cells reconstituted with vector (KO+vector), KDM6A (KO+WT) or KDM6A-ED (KO+ED). No enrichment was observed on amplicon H, used as a negative control. Mean  $\pm$  s.d. are given for three independent experiments.

**(G)** Total levels of H3K27me3 and H3K27ac from K562 cell lines as indicated were determined by western blot. Total histone H3 was used as a loading control.

**(H)** Immunoprecipitation showing Flag-KDM6A binds to RNA polII but not CBP in K562 cells. IgG was used as a control.

**(I)** K562 cells were subjected to CHIP assay using antibodies against YY1 antibody to confirm antibody binding efficiency. IgG was used as a control.

**(J, K)** ChIP-qPCR assays were conducted using antibodies against YY1 **(I)** or KDM6A **(J)** in control K562 versus KDM6A-KO cells or cells with YY1 knockdown. Mean  $\pm$  s.d. are given for three independent experiments.

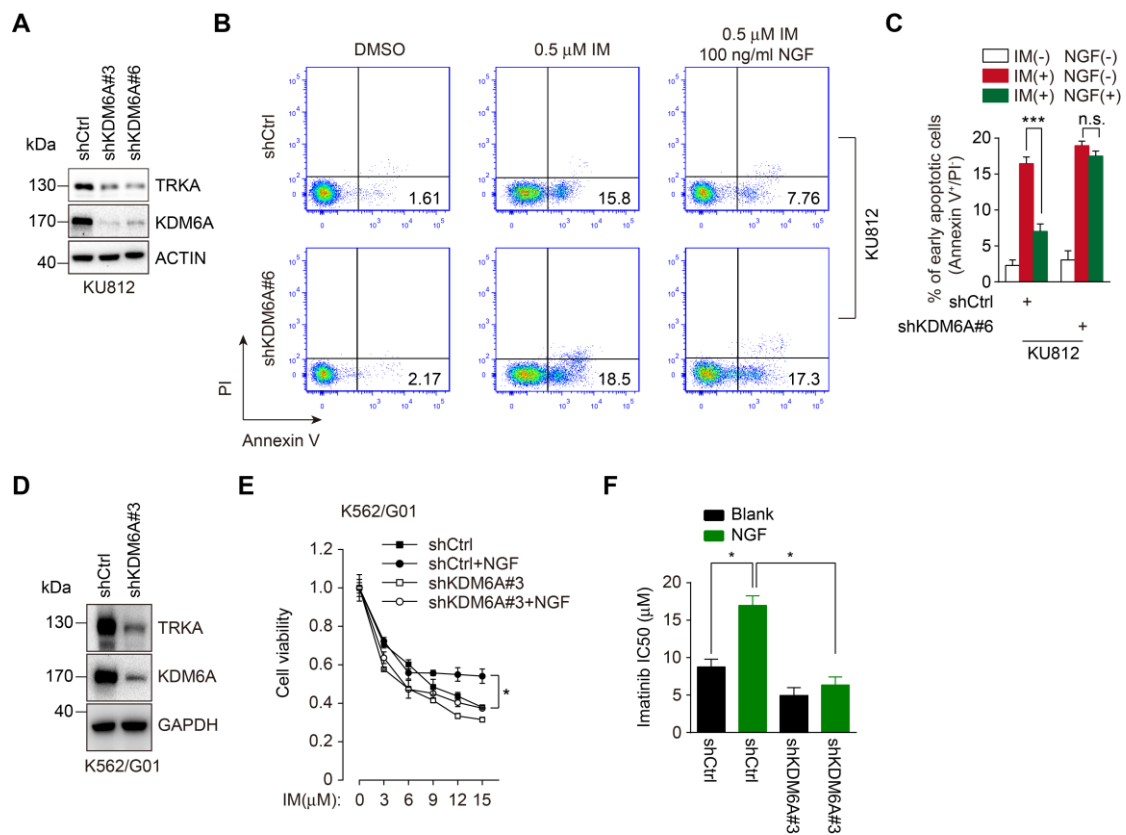

**Figure S7. Role of TRKA and NGF signaling in CML cell line resistance to imatinib**

(A) Western blot verification of KDM6A RNAi efficiency and effect on TRKA expression in KU812 cells.

(B) Representative FACS dotplots of FITC Annexin V/PI staining used to assess apoptosis after addition of carrier (DMSO) or 0.5 μM imatinib for 24 h alone or in combination with 100 ng/mL NGF. Parental control KU812 cells are compared with KDM6A KD cells.

(C) The rates of apoptosis in shCtrl versus shKDM6A KU812 cells after 24 h treatment with DMSO vehicle control or 0.5 μM imatinib alone or in combination with 100 ng/mL NGF. Unpaired, two-tailed Student's t-test; \*\*\* $p < 0.001$ ; n.s., not significant.

(D) Western blot verification of KDM6A RNAi efficiency in imatinib-resistant K562/G01 cells.

(E, F) Cell survival comparisons between of K562/G01 control and KDM6A RNAi after 24 h of growth in 10% FBS containing medium supplemented with or without 100 ng/mL NGF in the presence of imatinib (dose indicated on the abscissa) (E). Live cells were counted by Trypan blue exclusion and results calculated as a percentage of growth seen with untreated controls. Comparison of IC<sub>50</sub> values for imatinib with or without 100 ng/mL NGF in K562/G01 cell lines (F). The IC<sub>50</sub> values were determined using GraphPad Prism. Mean  $\pm$  s.d. are given for three independent experiments. Mean  $\pm$  s.d. are given for three independent

experiments. One-way ANOVA; \* $p < 0.05$ .

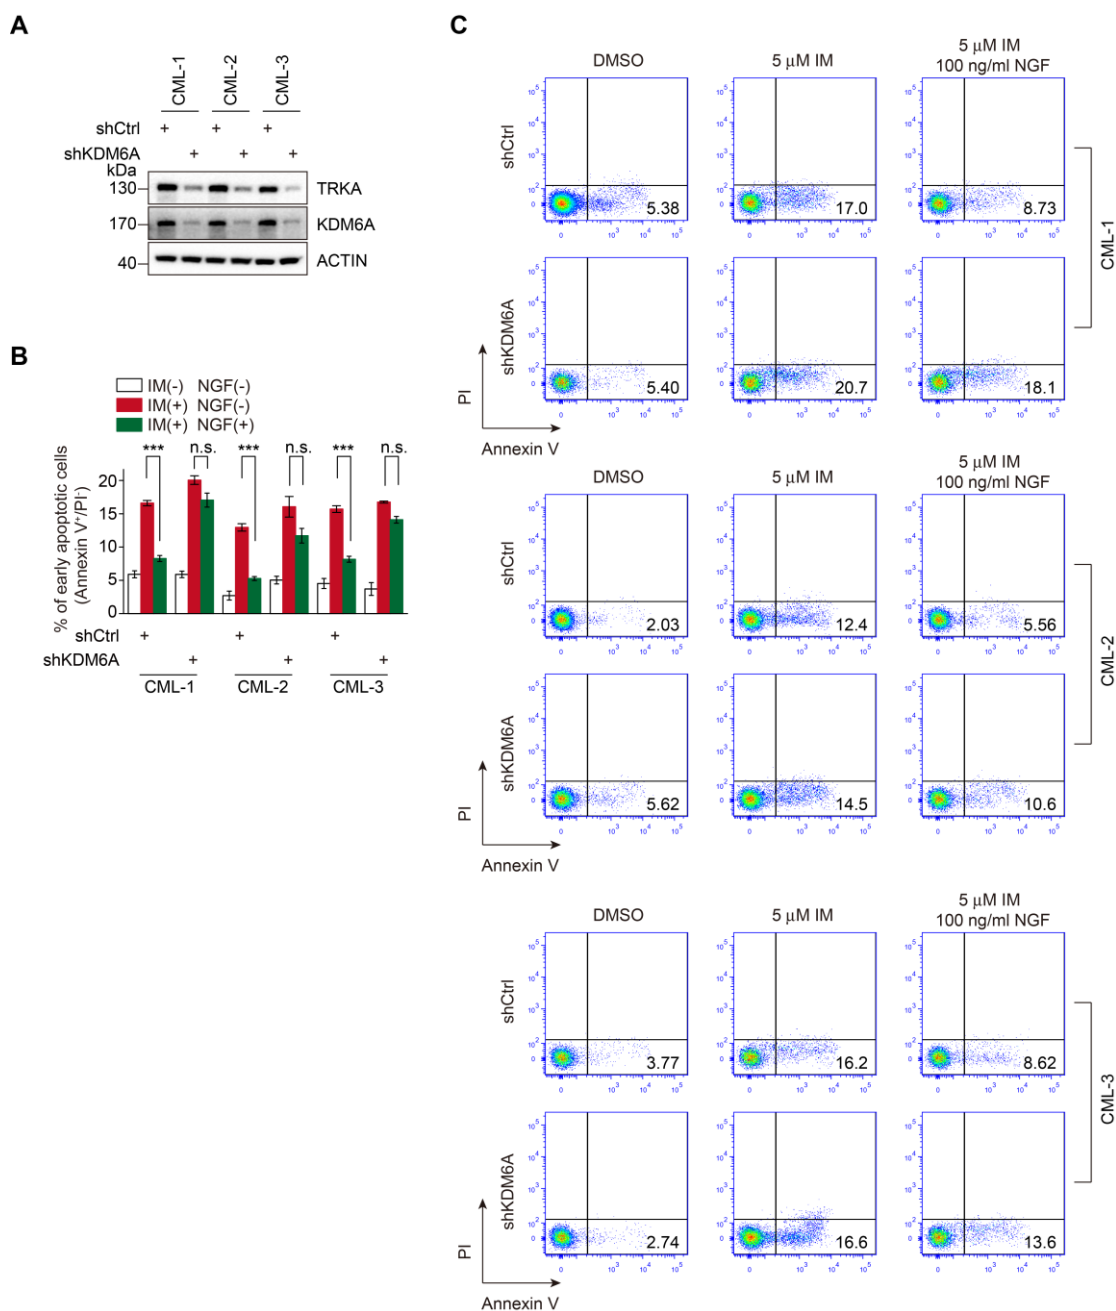

**Figure S8. Role of TRKA and NGF signaling in imatinib resistance of *ex vivo* CML cells**

(A) Western blot verification of KDM6A RNAi efficiency and effect on TRKA expression in CML patients cells.

(B) The rates of apoptosis in shCtrl versus shKDM6A CML patients cells after 48 h treatment with DMSO vehicle control or 5  $\mu$ M imatinib alone or in combination with 100 ng/mL NGF. The percentage of early apoptotic cells was determined by FACS using annexin V/PI double staining. Mean  $\pm$  s.d. are given for three independent experiments. Unpaired, two-tailed Stu-

dent's t-test; \*\*\* $p < 0.001$ .

(C) Representative FACS dotplots of FITC Annexin V/PI staining used to assess apoptosis after addition of carrier (DMSO) or 5  $\mu$ M imatinib for 48 h alone or in combination with 100 ng/mL NGF. Parental control CML patients cells are compared with KDM6A KD cells.

**Table S1** Patient cohort and demographics

| <b>No.</b> | <b>Group</b> | <b>Type of disease</b> | <b>Age</b> | <b>Gender</b> | <b>Stage</b>   | <b>Therapy</b>        | <b>BCR/ABL</b> | <b>Blast count (%)</b> | <b>KDM6A expression</b> | <b>NTRK1 expression</b> |
|------------|--------------|------------------------|------------|---------------|----------------|-----------------------|----------------|------------------------|-------------------------|-------------------------|
| C01        | Ctrl         | ITP                    | 70         | Male          | Not applicable | Not applicable        | Not applicable | 1.00                   | 1.18                    | 0.28                    |
| C02        | Ctrl         | ITP                    | 37         | Female        | Not applicable | Not applicable        | Not applicable | 0.50                   | 0.83                    | 0.29                    |
| C03        | Ctrl         | ITP                    | 37         | Female        | Not applicable | Not applicable        | Not applicable | 1.50                   | 0.96                    | 2.73                    |
| C04        | Ctrl         | ITP                    | 36         | Female        | Not applicable | Not applicable        | Not applicable | 0.00                   | 1.17                    | 2.90                    |
| C05        | Ctrl         | ITP                    | 48         | Male          | Not applicable | Not applicable        | Not applicable | 0.00                   | 0.61                    | 1.36                    |
| C06        | Ctrl         | ITP                    | 55         | Female        | Not applicable | Not applicable        | Not applicable | 0.50                   | 1.50                    | 1.15                    |
| ND01       | ND           | CML                    | 51         | Male          | AP             | Not applicable        | positive       | 14.00                  | 1.98                    | 5.09                    |
| ND02       | ND           | CML                    | 57         | Male          | CP             | Not applicable        | positive       | 1.50                   | 1.27                    | 6.23                    |
| ND03       | ND           | CML                    | 42         | Female        | CP             | Not applicable        | positive       | 0.00                   | 1.87                    | 2.84                    |
| ND04       | ND           | CML                    | 25         | Female        | CP             | Not applicable        | positive       | 2.00                   | 1.62                    | 5.65                    |
| ND05       | ND           | CML                    | 43         | Female        | CP             | Not applicable        | positive       | 3.00                   | 1.04                    | 4.88                    |
| ND06       | ND           | CML                    | 40         | Female        | CP             | Not applicable        | positive       | 1.00                   | 1.49                    | 1.76                    |
| ND07       | ND           | CML                    | 24         | Male          | CP             | Not applicable        | positive       | 1.50                   | 2.98                    | 8.05                    |
| ND08       | ND           | CML                    | 33         | Male          | CP             | Not applicable        | positive       | 0.00                   | 1.10                    | 1.66                    |
| ND09       | ND           | CML                    | 70         | Male          | CP             | Not applicable        | positive       | 1.00                   | 1.37                    | 4.28                    |
| ND10       | ND           | CML                    | 29         | Female        | CP             | Not applicable        | positive       | 1.50                   | 2.80                    | 6.96                    |
| ND11       | ND           | CML                    | 43         | Female        | CP             | Not applicable        | positive       | 1.00                   | 1.66                    | 6.23                    |
| ND12       | ND           | CML                    | 51         | Male          | CP             | Not applicable        | positive       | 2.00                   | 2.65                    | 9.57                    |
| S01        | IM-S         | CML                    | 49         | Male          | CP             | Imatinib              | positive       | 2.50                   | 0.55                    | 2.73                    |
| S02        | IM-S         | CML                    | 65         | Male          | CP             | Imatinib              | positive       | 2.00                   | 3.48                    | 3.26                    |
| S03        | IM-S         | CML                    | 53         | Male          | CP             | Hydroxyurea, Imatinib | positive       | 0.50                   | 0.69                    | 0.04                    |
| S04        | IM-S         | CML                    | 46         | Female        | CP             | Imatinib              | positive       | 1.50                   | 1.01                    | 0.00                    |

|     |      |     |    |        |    |                       |              |       |      |      |
|-----|------|-----|----|--------|----|-----------------------|--------------|-------|------|------|
| S05 | IM-S | CML | 51 | Female | AP | Hydroxyurea, Imatinib | positive     | 13.00 | 3.55 | 0.01 |
| S06 | IM-S | CML | 54 | Male   | AP | Imatinib              | positive     | 15.00 | 0.60 | 0.03 |
| S07 | IM-S | CML | 51 | Male   | BP | Imatinib              | positive     | 39.00 | 0.72 | 0.02 |
| S08 | IM-S | CML | 51 | Female | CP | Imatinib              | positive     | 0.50  | 1.47 | 3.55 |
| S09 | IM-S | CML | 39 | Male   | CP | Imatinib              | Undetermined | 1.50  | 1.60 | 2.36 |
| S10 | IM-S | CML | 49 | Female | CP | Imatinib              | Undetermined | 0.00  | 1.62 | 0.48 |
| S11 | IM-S | CML | 17 | Male   | CP | Imatinib              | positive     | 0.50  | 1.09 | 6.31 |
| S12 | IM-S | CML | 69 | Female | CP | Imatinib              | positive     | 1.50  | 2.20 | 4.49 |
| S13 | IM-S | CML | 62 | Male   | BP | Imatinib              | positive     | 90.50 | 3.27 | 0.04 |
| S14 | IM-S | CML | 54 | Male   | CP | Cytarabine, Imatinib  | Undetermined | 1.00  | 0.96 | 3.18 |
| S15 | IM-S | CML | 50 | Female | CP | Imatinib              | positive     | 1.00  | 0.78 | 9.04 |
| S16 | IM-S | CML | 71 | Female | CP | Imatinib              | positive     | 1.00  | 0.50 | 7.25 |
| S17 | IM-S | CML | 44 | Male   | BP | Imatinib              | positive     | 23.50 | 0.03 | 1.07 |
| S18 | IM-S | CML | 19 | Male   | CP | Imatinib              | positive     | 1.00  | 0.32 | 6.31 |
| S19 | IM-S | CML | 51 | Male   | CP | Imatinib              | positive     | 3.50  | 0.96 | 0.51 |
| S20 | IM-S | CML | 53 | Female | CP | Imatinib              | positive     | 0.50  | 1.34 | 4.65 |
| S21 | IM-S | CML | 52 | Female | CP | Imatinib              | positive     | 1.50  | 3.34 | 1.49 |
| S22 | IM-S | CML | 47 | Male   | CP | Hydroxyurea, Imatinib | positive     | 1.00  | 1.86 | 6.01 |
| S23 | IM-S | CML | 6  | Male   | CP | Imatinib              | positive     | 2.00  | 1.05 | 1.22 |
| S24 | IM-S | CML | 33 | Male   | CP | Imatinib              | positive     | 1.50  | 1.33 | 0.60 |
| S25 | IM-S | CML | 35 | Male   | CP | Imatinib              | positive     | 2.00  | 0.39 | 0.48 |
| S26 | IM-S | CML | 57 | Female | CP | Imatinib              | positive     | 0.50  | 0.98 | 0.25 |
| S27 | IM-S | CML | 61 | Male   | CP | Imatinib              | positive     | 1.50  | 1.42 | 1.67 |
| S28 | IM-S | CML | 58 | Male   | CP | Hydroxyurea, Imatinib | positive     | 1.00  | 0.81 | 5.04 |
| S29 | IM-S | CML | 55 | Male   | BP | Hydroxyurea, Imatinib | Undetermined | 29.50 | 0.59 | 0.11 |
| S30 | IM-S | CML | 63 | Male   | CP | Imatinib              | positive     | 1.50  | 3.93 | 0.17 |

|     |      |     |    |        |    |                                |              |       |       |      |
|-----|------|-----|----|--------|----|--------------------------------|--------------|-------|-------|------|
| S31 | IM-S | CML | 76 | Female | CP | Hydroxyurea, Imatinib          | positive     | 1.00  | 0.22  | 0.65 |
| S32 | IM-S | CML | 43 | Male   | CP | Imatinib                       | Undetermined | 1.00  | 2.40  | 4.51 |
| S33 | IM-S | CML | 63 | Male   | CP | Imatinib                       | positive     | 0.50  | 0.70  | 0.36 |
| S34 | IM-S | CML | 54 | Male   | CP | Imatinib                       | positive     | 2.50  | 1.28  | 0.53 |
| S35 | IM-S | CML | 60 | Female | BP | Imatinib                       | positive     | 75.50 | 0.46  | 1.79 |
| S36 | IM-S | CML | 67 | Male   | CP | Imatinib                       | positive     | 1.50  | 1.91  | 1.95 |
| S37 | IM-S | CML | 27 | Female | CP | Imatinib                       | positive     | 0.50  | 1.14  | 0.88 |
| S38 | IM-S | CML | 47 | Female | CP | Imatinib                       | positive     | 0.50  | 2.65  | 5.43 |
| S39 | IM-S | CML | 71 | Male   | CP | Imatinib                       | positive     | 0.50  | 0.69  | 1.03 |
| S40 | IM-S | CML | 47 | Male   | CP | Imatinib                       | positive     | 0.50  | 1.98  | 5.09 |
| S41 | IM-S | CML | 55 | Male   | CP | Imatinib                       | positive     | 1.00  | 1.27  | 6.23 |
| S42 | IM-S | CML | 48 | Female | CP | Imatinib                       | positive     | 1.00  | 1.87  | 2.84 |
| S43 | IM-S | CML | 45 | Male   | BP | Imatinib                       | positive     | 23.50 | 1.62  | 5.65 |
| S44 | IM-S | CML | 26 | Female | CP | Imatinib                       | positive     | 0.50  | 1.04  | 4.88 |
| S45 | IM-S | CML | 72 | Male   | CP | Imatinib                       | positive     | 1.00  | 1.49  | 1.76 |
| S46 | IM-S | CML | 64 | Male   | CP | Imatinib                       | positive     | 1.00  | 2.98  | 8.05 |
| S47 | IM-S | CML | 27 | Female | CP | Imatinib                       | positive     | 0.00  | 1.10  | 1.66 |
| S48 | IM-S | CML | 23 | Male   | CP | Imatinib                       | positive     | 0.50  | 1.37  | 4.28 |
| S49 | IM-S | CML | 84 | Male   | CP | Imatinib                       | positive     | 0.50  | 2.80  | 6.96 |
| S50 | IM-S | CML | 36 | Female | CP | Imatinib                       | positive     | 0.00  | 1.66  | 6.23 |
| S51 | IM-S | CML | 72 | Male   | CP | Imatinib                       | positive     | 2.00  | 2.65  | 9.57 |
| R01 | IM-R | CML | 63 | Male   | AP | Imatinib,<br>Homoharringtonine | positive     | 13.00 | 2.34  | 3.32 |
| R02 | IM-R | CML | 27 | Male   | CP | Imatinib                       | positive     | 0.00  | 1.33  | 1.14 |
| R03 | IM-R | CML | 61 | Male   | AP | Imatinib                       | positive     | 12.00 | 15.50 | 5.18 |
| R04 | IM-R | CML | 50 | Female | BP | Hydroxyurea, Imatinib,         | positive     | 81.00 | 0.59  | 1.07 |

| Homoharringtonine |      |     |    |        |    |                       |          |       |       |       |
|-------------------|------|-----|----|--------|----|-----------------------|----------|-------|-------|-------|
| R05               | IM-R | CML | 37 | Male   | CP | Imatinib              | positive | 2.50  | 1.58  | 1.40  |
| R06               | IM-R | CML | 45 | Female | CP | Imatinib              | positive | 2.00  | 1.18  | 0.90  |
| R07               | IM-R | CML | 43 | Male   | CP | Imatinib              | positive | 1.00  | 0.68  | 1.28  |
| R08               | IM-R | CML | 51 | Female | AP | Imatinib              | positive | 10.50 | 9.54  | 7.27  |
| R09               | IM-R | CML | 43 | Female | CP | Imatinib              | positive | 0.00  | 3.24  | 0.12  |
| R10               | IM-R | CML | 53 | Male   | CP | Imatinib              | positive | 1.00  | 4.11  | 3.43  |
| R11               | IM-R | CML | 29 | Male   | CP | Imatinib              | positive | 1.00  | 0.72  | 7.20  |
| R12               | IM-R | CML | 41 | Female | CP | Imatinib              | positive | 0.50  | 1.38  | 7.15  |
| R13               | IM-R | CML | 61 | Male   | CP | Imatinib              | positive | 0.50  | 2.44  | 0.09  |
| R14               | IM-R | CML | 23 | Male   | CP | Imatinib              | positive | 1.50  | 0.42  | 1.14  |
| R15               | IM-R | CML | 45 | Male   | BP | Imatinib              | positive | 25.00 | 16.20 | 38.51 |
| R16               | IM-R | CML | 62 | Male   | CP | Imatinib              | positive | 0.00  | 0.04  | 23.54 |
| R17               | IM-R | CML | 48 | Female | AP | Imatinib              | positive | 15.00 | 2.27  | 10.26 |
| R18               | IM-R | CML | 55 | Male   | BP | Imatinib              | positive | 36.00 | 4.07  | 7.40  |
| R19               | IM-R | CML | 52 | Female | CP | Imatinib              | positive | 0.00  | 8.13  | 22.45 |
| R20               | IM-R | CML | 55 | Female | CP | Hydroxyurea,Imatinib, | positive | 1.00  | 2.37  | 9.44  |
| Homoharringtonine |      |     |    |        |    |                       |          |       |       |       |
| R21               | IM-R | CML | 48 | Male   | CP | Imatinib              | positive | 0.50  | 9.08  | 59.23 |
| CML-1             | ND   | CML | 51 | Female | CP | Not applicable        | positive | 1.50  | N/A   | N/A   |
| CML-2             | ND   | CML | 42 | Female | CP | Not applicable        | positive | 2.00  | N/A   | N/A   |
| CML-3             | ND   | CML | 65 | Male   | CP | Not applicable        | positive | 1.00  | N/A   | N/A   |

N/A, not analyzed;Not applicable, patients were not subjected to treatment;AP, accelerated phase;BP, blastic phase;CP, chronic phase.

Patients in the chronic phase typically have less than 10% blasts in their blood or bone marrow samples.

Most patients with accelerated phase of CML have 10% to 19% blasts in both the blood and bone marrow.In the blast phase, there are 20% or more blasts in the blood or bone marrow.



**Table S2** Cell lines used in the study

| <b>Cell line name</b> | <b>Cell Type</b>               | <b>Gender</b> | <b>Mycoplasma Test</b> | <b>STR analysis</b> |
|-----------------------|--------------------------------|---------------|------------------------|---------------------|
| K562                  | CML in blast crisis            | Female        | Negative               | Verified            |
| K562/G01              | CML in blast crisis            | Female        | Negative               | Undetermined        |
| MEG-01                | CML in megakaryoblastic crisis | Male          | Negative               | Verified            |
| KU812                 | CML in blast crisis            | Male          | Negative               | Verified            |

**Table S3** Primer sequence information

| Usage | Name    |                                                                         | Sequence                                                                | T <sub>m</sub> (°C) | Amplicon length | Amplification efficiency(%) |
|-------|---------|-------------------------------------------------------------------------|-------------------------------------------------------------------------|---------------------|-----------------|-----------------------------|
| shRNA | control | Forward                                                                 | GATCGGGTCTCCGAACGTGTCAC-<br>GTTTCCGAAGAAACGTGACACGTTTCGGA-<br>GAATTTTTC | 73.3                | Not applicable  | Not applicable              |
|       |         | Reverse                                                                 | AATTGAAAAATTCTCCGAACGTGTCAC-<br>GTTTCTTCGGAACGTGACACGTTTCGGA-<br>GAACCC | 72.6                |                 |                             |
|       | KDM1B   | Forward                                                                 | GATCGGGTCCCGGGTACTCGGTGA-<br>TAATCGAAATTATCACCGAGTACCCGGGAT-<br>TTTTC   | 72.6                | Not applicable  | Not applicable              |
|       |         | Reverse                                                                 | AATTGAAAAATCCCGGGTACTCGGTGA-<br>TAATTTTCGATTATCACCGAGTACCCGGGACCC       | 71.9                |                 |                             |
|       | KDM4B   | Forward                                                                 | GATCGGGGTGGAAGCTGAAATGCGTGTAC-<br>GAATACACGCATTTTCAGCTTCCACTTTTTTC      | 72.5                | Not applicable  | Not applicable              |
|       |         | Reverse                                                                 | AATTGAAAAAGTGGAAGCTGAAATGCGTG-<br>TATTCGTACACGCATTTTCAGCTTCCACCCC       | 71.8                |                 |                             |
| KDM5B | Forward | GATCGGGGTGCCTGTTTAC-<br>CGAACTAATCGAAATTAGTTTCGG-<br>TAAACAGGCACTTTTTTC | 70.5                                                                    | Not applicable      | Not applicable  |                             |
|       | Reverse | AATTGAAAAAGTGCCTGTTTAC-<br>CGAACTAATTTTCGATTAGTTTCGG-<br>TAAACAGGCACCCC | 69.8                                                                    |                     |                 |                             |

|         |         |                                                                         |      |                |                |
|---------|---------|-------------------------------------------------------------------------|------|----------------|----------------|
| KDM6A#3 | Forward | GATCGGGGACTATGAGTCTAGTTTAAA-<br>GCGAACTTTAAACTAGACTCATAGTCTTTTTC        | 66.2 | Not applicable | Not applicable |
|         | Reverse | AATTGAAAAAAGACTATGAGTCTAG-<br>TTTAAAGTTCGCTTTTAAACTA-<br>GACTCATAGTCCCC | 65.4 |                |                |
| KDM6A#6 | Forward | GATCGGGAAGACCACTCAGA-<br>TAGTGAATCGAAATTCACTATCTGAG-<br>TGGTCTTTTTTTC   | 68.1 | Not applicable | Not applicable |
|         | Reverse | AATTGAAAAAAGACCACTCAGA-<br>TAGTGAATTCGATTCACTATCTGAG-<br>TGGTCTTCCC     | 67.4 |                |                |
| KDM6B   | Forward | GATCGGGAGTCCCCTCACCTCTATTTACGAA-<br>TAAATAGAGGTGAGTGGGACTTTTTTTC        | 69.3 | Not applicable | Not applicable |
|         | Reverse | AATTGAAAAAAGTCCCCTCACCTC-<br>TATTTATTCGTAAATAGAGGTGAGTGGGACTCCC         | 68.5 |                |                |
| YY1#1   | Forward | GATCGGGCGATGGTTGTAATAA-<br>GAAGTTCGAAAACCTTCTTATTACAAC-<br>CATCGTTTTTC  | 67.6 | Not applicable | Not applicable |
|         | Reverse | AATTGAAAAACGATGGTTGTAATAA-<br>GAAGTTTTTCGAACTTCTTATTACAACCATCGCCC       | 66.8 |                |                |
| YY1#2   | Forward | GATCGGGGCTCTCCTTT-<br>GTATATTATTCGAAAATAATATACAAAGGA-<br>GAGGCTTTTTTC   | 66.6 | Not applicable | Not applicable |
|         | Reverse | AATTGAAAAAGCCTCTCCTTT-<br>GTATATTATTTTCGAATAATATACAAAGGA-<br>GAGGCCCC   | 65.9 |                |                |

|              |         |                                                                       |                       |                |                |     |
|--------------|---------|-----------------------------------------------------------------------|-----------------------|----------------|----------------|-----|
| C-FOS#1      | Forward | GATCGGGGCGGAGACAGACCAACTAGAAC-<br>GAATTCTAGTTGGTCTGTCTCCGCTTTTTC      | 72.8                  | Not applicable | Not applicable |     |
|              | Reverse | AATTGAAAAAGCGGAGACAGACCAACTA-<br>GAATTCGTTCTAGTTGGTCTGTCTCCGCCCC      | 72.1                  |                |                |     |
| C-FOS#2      | Forward | GATCGGGTCTGCTTTGCAGACCGAGAT-<br>TCGAAAATCTCGGTCTGCAAAGCAGATTTTTC      | 72.3                  | Not applicable | Not applicable |     |
|              | Reverse | AATTGAAAAATCTGCTTTGCAGACCGAGAT-<br>TTTCGAATCTCGGTCTGCAAAGCAGACCC      | 71.7                  |                |                |     |
| TRKA#1       | Forward | GATCGGGCATCGAGAACCCACAA-<br>TACTTCGAAAAGTATTGTGGGTTCTCGATGTTTT<br>TC  | 70.5                  | Not applicable | Not applicable |     |
|              | Reverse | AATTGAAAAACATCGAGAACCCACAA-<br>TACTTTTCGAAGTATTGTGGGTTCTCGATGCCC      | 69.7                  |                |                |     |
| TRKA#2       | Forward | GATCGGGCCTGCTGGCTTGGCTGA-<br>TACTCGAAAGTATCAGCCAAGCCAG-<br>CAGGTTTTTC | 75.3                  | Not applicable | Not applicable |     |
|              | Reverse | AATTGAAAAACCTGCTGGCTTGGCTGA-<br>TACTTTTCGAGTATCAGCCAAGCCAGCAGGCC      | 74.6                  |                |                |     |
| <b>Q-PCR</b> | actin   | Forward                                                               | AAGACCTGTACGCCAACACAG | 53.8           | 88             | 101 |
|              |         | Reverse                                                               | AGGGCAGTGATCTCCTTCT   | 55.2           |                |     |
| KDM1B        | Forward | CTCTCCTGTGGGGAACATTTTC                                                | 55.1                  | 126            | 102            |     |
|              | Reverse | GACTAGGTTTCGGTTTTTGCCATT                                              | 55.9                  |                |                |     |
| KDM4B        | Forward | AGACGTATGATGACATCGACGA                                                | 55.9                  | 227            | 96             |     |
|              | Reverse | CGTAGATCGGGGAGACAAAGG                                                 | 56.8                  |                |                |     |
| KDM5B        | Forward | CAATGCTGTGGACCTGTATGT                                                 | 55.1                  | 229            | 98             |     |
|              | Reverse | TACGGAGGGTATAGTCCCTGG                                                 | 56.3                  |                |                |     |

|                     |                     |         |                                                |      |                |                |
|---------------------|---------------------|---------|------------------------------------------------|------|----------------|----------------|
|                     | KDM6A               | Forward | GGACATGCTGTGTCACATCCT                          | 57.2 | 189            | 101            |
|                     |                     | Reverse | CTCCTGTTGGTCTCATTTGGTG                         | 55.9 |                |                |
|                     | KDM6B               | Forward | CGCTGCCTCACCCATATCC                            | 57.5 | 186            | 103            |
|                     |                     | Reverse | ATCCGCGACCTCTGAACTCT                           | 57.6 |                |                |
|                     | NTRK1               | Forward | CCATTTCACTCCTCGGCTCA                           | 56.7 | 194            | 102            |
|                     |                     | Reverse | TGCAGCTTCTGTTCAGGCACT                          | 59.3 |                |                |
| <b>ChIP</b>         | NTRK1-A             | Forward | CTTGCCCCTGTTTGATGATTG                          | 54.6 | 83             | 103            |
|                     |                     | Reverse | CCTGAGGACCGAAGAATCAAACCT                       | 56.8 |                |                |
|                     | NTRK1-B             | Forward | TGTTAGCCCTTGGTCCATGAA                          | 56   | 85             | 102            |
|                     |                     | Reverse | TTGCAGGAGCACAAGAAAAGC                          | 56.8 |                |                |
|                     | NTRK1-C             | Forward | TGAGATTTCTCCCCTCCTAAAGGT                       | 56.8 | 120            | 97             |
|                     |                     | Reverse | CAAGTAGGCAGCTGGAATTCAGA                        | 57.2 |                |                |
|                     | NTRK1-D             | Forward | GCTGGGCTGGTCTCTTAAGGA                          | 58.3 | 104            | 98             |
|                     |                     | Reverse | CGGGCATGCCTCCCTTAC                             | 57.6 |                |                |
|                     | NTRK1-E             | Forward | AGAAGAGAGGGCTGGGAGATAAAG                       | 57.5 | 86             | 101            |
|                     |                     | Reverse | CTGTCCCTAAGGCCTCGAATG                          | 57   |                |                |
|                     | NTRK1-F             | Forward | GAAGGACTGAGACGGGAATGTG                         | 57.4 | 100            | 96             |
|                     |                     | Reverse | ATGACCAGGGTGCAGTGCAT                           | 59   |                |                |
|                     | NTRK1-G             | Forward | CTGCCCTAGCAAGCTTTATGGT                         | 57.3 | 87             | 95             |
|                     |                     | Reverse | CCCCTTCGATCTCCCTGAAG                           | 56.2 |                |                |
|                     | NTRK1-H             | Forward | CCGATGAGAGTAGCCACAGGTAA                        | 58   | 96             | 102            |
|                     |                     | Reverse | GGTGGAGCCAGCTTTTTTGG                           | 56.5 |                |                |
|                     | Gene_desert         | Forward | CATCCCTGGACTGATTGTCA                           | 53.9 | 200            | 97             |
|                     |                     | Reverse | GGTTGGCCAGGTACATGTTT                           | 55.3 |                |                |
| <b>Point mutant</b> | KDM6A <sup>ED</sup> | Forward | AACACCAGGTGCGCAGGCGAA-<br>TAACAACCTTCTGTTCAGTT | 69.5 | Not applicable | Not applicable |

|                                 |          |         |                                                |      |                |                |
|---------------------------------|----------|---------|------------------------------------------------|------|----------------|----------------|
|                                 |          | Reverse | AGTTGTTATTCGCCTGCGCAC-<br>CTGGTGTCTCTGCTCCCTGG | 72.8 |                |                |
| <b>gRNA</b>                     | KDM6A-g1 | Forward | CACCGGTTGCACAGGTACGATCTAC                      | 61.6 | Not applicable | Not applicable |
|                                 |          | Reverse | AAACGTAGATCGTACCTGTGCAACC                      | 59.6 |                |                |
|                                 | KDM6A-g2 | Forward | CACCGGAGTGAGTGCGTTTCGCTGC                      | 66.7 | Not applicable | Not applicable |
|                                 |          | Reverse | AAACGCAGCGAAACGCACTCACTCC                      | 64.8 |                |                |
| <b>Identification of mutant</b> | KDM6A-I  | Forward | ACATCTTCATATTCATCTGG                           | 47   | Not applicable | Not applicable |
|                                 |          | Reverse | TTGCTAAGTTATCTATGTCG                           | 47.2 |                |                |
